# Supplementary material
Source: PubMed Central journal article supplement (PMC6105899)
Supplement: zii999092514s1.pdf [file zii999092514s1.pdf]

1 **Supplemental material**

2  
3 **Table S1** RNA-Seq data showing the downregulation of the A1S\_2091- A1S\_2088 operon when  
4 bacterial cells were cultured in SB at 24°C in the presence of light

5

| Gene Identifier <sup>a</sup> | Fold Change | P value | Predicted function       |
|------------------------------|-------------|---------|--------------------------|
| A1S_2088                     | -2.75       | 0.0008  | Hypothetical             |
| A1S_2089                     | -4.41       | 0.0001  | Fimbrial usher protein   |
| A1S_2090                     | -3.08       | 0.0014  | P pilus assembly protein |
| A1S_2091                     | -5.67       | 0.0001  | Hypothetical             |

6 <sup>a</sup>The A1S\_2091-A1S\_2088 operon is described as the *prpABCD* operon in this report.

7  
8  
9 **Table S2** Primers used in this study

10

| Primer number | Nucleotide Sequence <sup>a</sup>           |
|---------------|--------------------------------------------|
| 4100          | 5'-GCAAACCTTAAGAGTGTGTTG-3'                |
| 4101          | 5'-CCTTTAGTAACGTGTAACCTTC-3'               |
| 4151          | 5'-CGAAGCATTGTCTTTAGACC-3'                 |
| 4152          | 5'-GGCTACTAAATCCTCAGAAGG-3'                |
| 4153          | 5'-ATTGGAGTTGCAACAACCTGC-3'                |
| 4154          | 5'-CCACCAATCATACGACGTTG-3'                 |
| 4413          | 5'-ATGGTAGGATCCGTATGATGCCAAAAATAGAG-3'     |
| 4419          | 5'-GTCCACCATCAAATGACAAAGTCC-3'             |
| 4420          | 5'-CTGTGTCCTGAATACCTCAGC-3'                |
| 4465          | 5'-TGATGTGGATCCTTAATAAGTTACTGTGACTGTCAC-3' |
| 4470          | 5'-CACATTCGTATTGTCCTGTAACCTG-3'            |
| 4471          | 5'- ACTTGTAGTCGATCTTCTTGATC-3'             |
| 4488          | 5'-GCCCAGAACTACCACTGG-3'                   |
| 4489          | 5'-GCTTCTTTAAACGGAGGAGCC-3'                |
| 4615          | 5'-GGTAATGTCCAGACAGTTAACG-3'               |
| 4618          | 5'-TGCATCACTATTAATATTTGCTGC-3'             |

11 <sup>a</sup>Underlined nucleotides identify *Bam*HI restriction sites.

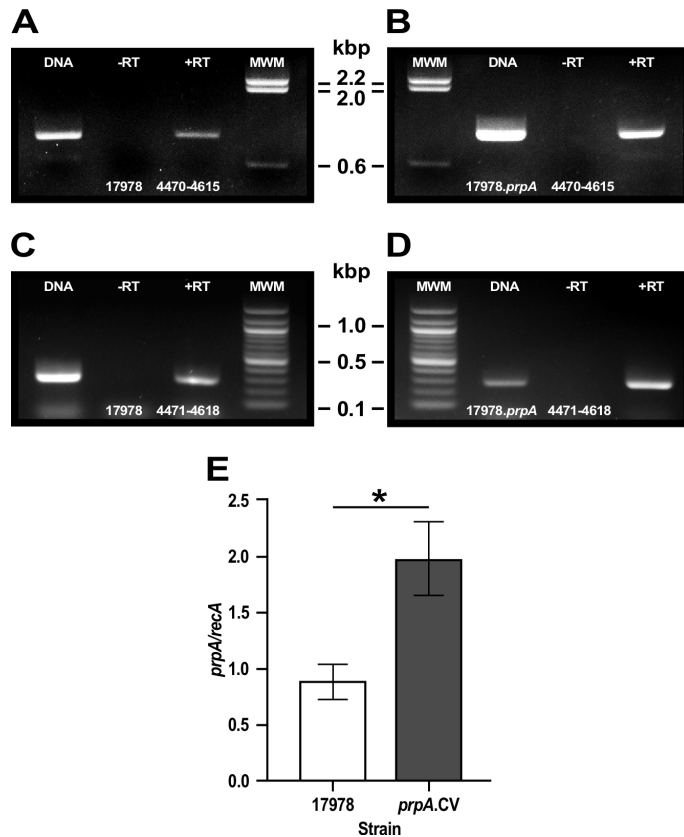

14

15

16 Figure S1. Transcriptional analyses of the *prpABCD* operon. RT-PCR with the intergenic primer

17 pairs shown in Fig. 1A using as templates DNA, RNA and cDNA samples obtained from cells of

18 the 17978 parental strain (A and C) or the 17978.*prpA* mutant (B and D) cultured in SB at 24°C in

19 darkness. Numbers in the panels represent primer pairs used to amplify the sequences located

20 between coding regions as displayed in Fig. 1A.  $\lambda$  *Hind*III-digested DNA and a 100-bp ladder were

21 used as molecular weight markers in panels A/B and C/D, respectively. (E) qRT-PCR analysis of

22 RNA isolated from 17978 and 17978.*prpA.CV* (*prpA.CV*) cells cultured in SB at 24°C in darkness

23 until they reached on OD<sub>600</sub> of 0.8. *recA* was used as a constitutively expressed control gene.

24 Horizontal bars identify statistically different values ( $P \leq 0.05$ , \*) and error bars represent the

25 standard error of each data set.

26

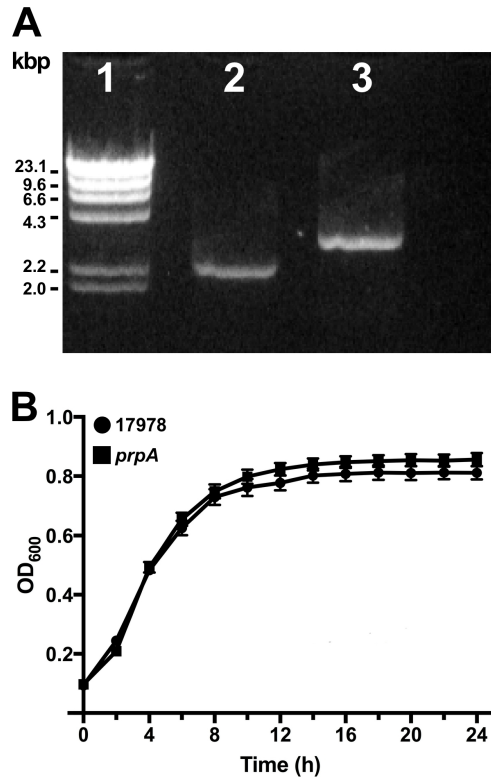

27

28 Figure S2. Analysis of the 17978.*prpA* insertion derivative. (A) Agarose gel electrophoresis of the  
 29 amplicons generated using primers 4151 and 4152 (Fig. 1A and Table S1) and total DNA isolated  
 30 from 17978 (lane 2) or 17978.*prpA* cells (lane 3). Lane 1,  $\lambda$  *Hind*III-digested DNA. (B) Growth  
 31 curves of 17978 and 17978.*prpA* cells cultured in LB broth at 37°C in a shaking plate reader set at  
 32 200 rpm. Error bars represent the standard error of each data set.

33

34
